# Supplementary material for: Adaptation of the group A Streptococcus adhesin Scl1 to bind fibronectin type III repeats within wound‐associated extracellular matrix: implications for cancer therapy
Source: PubMed Central journal article supplement (PMC6736723; doi:10.1111/mmi.14317), 2019-06-12
Supplement: NIHMS1033046-supplement-Supp_info.pdf [file NIHMS1033046-supplement-Supp_info.pdf]

Adaptation of the group A *Streptococcus* adhesin Scl1 to bind fibronectin type III repeats within wound-associated extracellular matrix: implications for cancer therapy

**Dudley H. McNitt<sup>1</sup>, Soo Jeon Choi<sup>1</sup>, Jessica L. Allen<sup>2</sup>, River A. Hames<sup>2</sup>, Scott A. Weed<sup>2</sup>, Livingston Van De Water<sup>3#</sup>, Rita Berisio<sup>4#</sup>, Slawomir Lukomski<sup>1\*</sup>**

<sup>1</sup>Department of Microbiology, Immunology, and Cell Biology, West Virginia University School of Medicine, Morgantown, WV, USA

<sup>2</sup>Department of Biochemistry, Program in Cancer Cell Biology, West Virginia University School of Medicine, Morgantown, WV, USA

<sup>3</sup>Departments of Surgery and Regenerative and Cancer Cell Biology, Albany Medical College, Albany, NY, USA

<sup>4</sup>Institute of Biostructures and Bioimaging, National Research Council, Naples, Italy

#Both authors equally contributed to this work

**\*To whom correspondence should be addressed:** Department of Microbiology, Immunology, and Cell Biology, West Virginia University School of Medicine, 2095 Heath Sciences North, PO Box 9177, Morgantown, WV 26506, USA. Tel: +1 304 293 6405; fax +1 304 293 7823; email: slukomski@hsc.wvu.edu

## **Supplementary Information**

**Table S1**

Sequences of Scl-V chimeras. Inserted loops are underlined and in bold. Sequence identities and root mean square deviations from Scl2.3 structure are given in the last two columns.

|                 | <b>Scaffold</b> | <b>Loop</b> | <b>Sequence of chimeras</b>                                                                                   | Seqid (%) | R.m.s.d. (Å) |
|-----------------|-----------------|-------------|---------------------------------------------------------------------------------------------------------------|-----------|--------------|
| <b>Scl.chi1</b> | Sc12.28         | Sc11.1      | DEQEEKAKVRTELIQELAQ <b><u>KYPEVSNEKFW</u></b><br><b><u>RKWYGTYFKE</u></b> LTYLQEREQAENSWRKRLK<br>GIQDHALD     | 35.8      | 1.1          |
| <b>Scl.chi3</b> | Sc12.28         | Sc11.28     | DEQEEKAKVRTELIQELAQ <b><u>KEYPKASEEKFW</u></b><br><b><u>ESFWGRRYFNEL</u></b> TYLQEREQAENSWRKRL<br>LKGIQDHALD  | 35.4      | 2.5          |
| <b>Scl.chi2</b> | Sc11.1          | Sc12.28     | EVSSTMTSSQRESKIKEIEESLK <b><u>GLGGIEKK</u></b><br><b><u>NEPTLGDEDLDHTYMTKL</u></b> EDFQKELKDFTE<br>KRLKEILDLI | 33.0      | 2.6          |
| <b>Scl.chiC</b> | Sc12.28         | Sc11.1      | DEQEEKAKVRTELIQELAQGLGGIEKKN <b><u>PER</u></b><br><b><u>KWYGYTYFKE</u></b> LTYLQEREQAENSWRKRLK<br>GIQDHALD    | 40.3      | 1.1          |

**Figure S1**

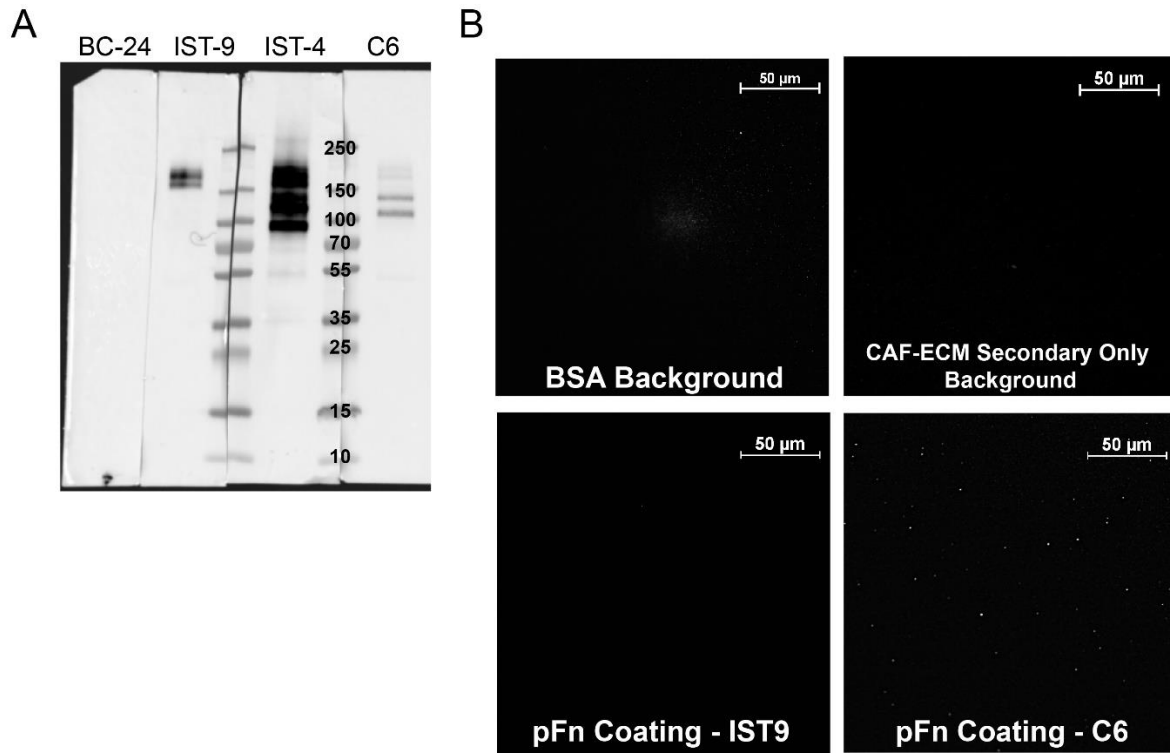

**Fig. S1.** Specificity of anti-ECM antibodies and background controls.

A. Antibodies against TnC (BC-24), EDA containing (IST-9) or EDB containing (C6) isoforms of cFn, as well as anti-fibronectin monoclonal antibody (IST-4), were analyzed by western immunoblotting of commercial preparations of cFn. Molecular weights, in kDa, are shown for PageRuler™ Plus protein ladder.

B. Immunofluorescent control images. 1 µg of BSA, 2 µg of plasma fibronectin (Sigma), or CAF-deposited matrices, were prepared on glass coverslips and incubated with primary mAbs, outlined in Fig. S1A. Secondary Ab conjugated with Alexa Fluor® 568 was used for detection. A representative image of BSA background (using anti-EDB antibody, C6) is shown in upper left panel, secondary only background on CAF-deposited ECM on upper right panel, and plasma fibronectin coatings in the bottom two rows. Images were taken using Nikon A1-R confocal microscope with 60x objective; representative images are shown from 2 independent experiments, imaging 10 arbitrary fields per coverslip.

**Figure S2**

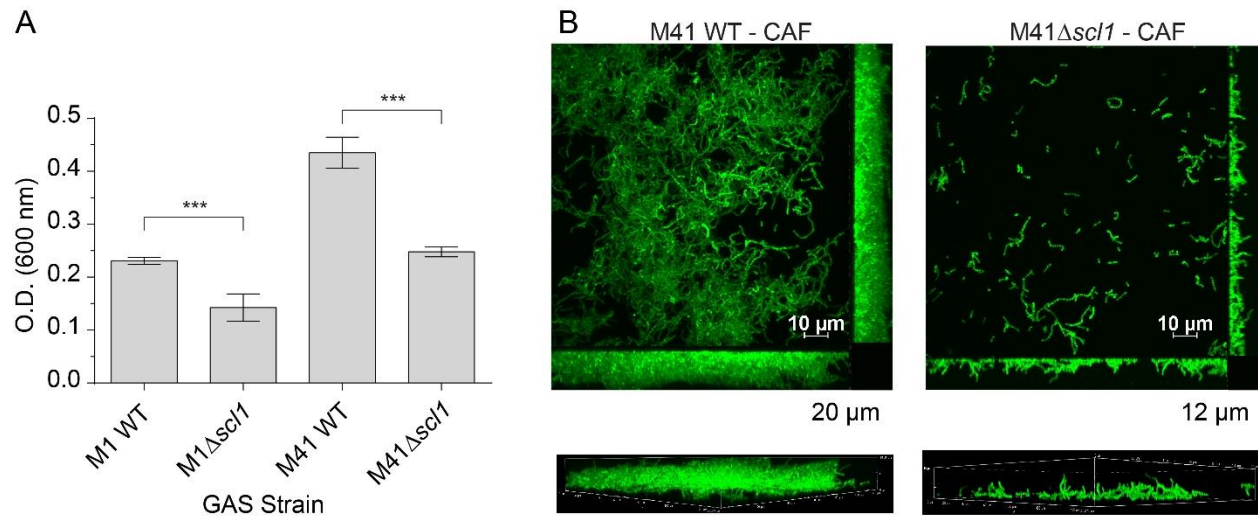

**Fig. S2.** SclI-mediated GAS biofilm formation on ECM deposited by cancer-derived fibroblasts (CAFs). WT GAS strains M1 and M41, and their isogenic  $\Delta sclI$  mutants were compared for biofilm formation.

A. Assessment of biofilm formation on rEDB-coated surfaces. M1 and M41 WT and their  $\Delta sclI$  isogenic mutants were compared. Biofilm formation was evaluated spectrophotometrically following crystal violet staining. Graphic bars indicate the mean OD<sub>600nm</sub> normalized against BSA controls. Statistical analysis was calculated using Student's two-tailed *t*-test from three independent experiments (N=3 $\pm$ SD); \*\*\*P $\leq$ 0.001.

B. Microscopy imaging of GAS biofilms formed on CAF-derived ECM. GFP-expressing M41 WT and  $\Delta sclI$  mutant strains were grown for 24 h on CAF-ECM matrix deposited on glass coverslips. Two-dimensional orthogonal views of GAS biofilms are representative of Z stacks from 10 fields within a single experiment. Average vertical thickness is indicated in micrometers below two-dimensional orthogonal views, taken from 10 arbitrary fields per experiment.

**Figure S3**

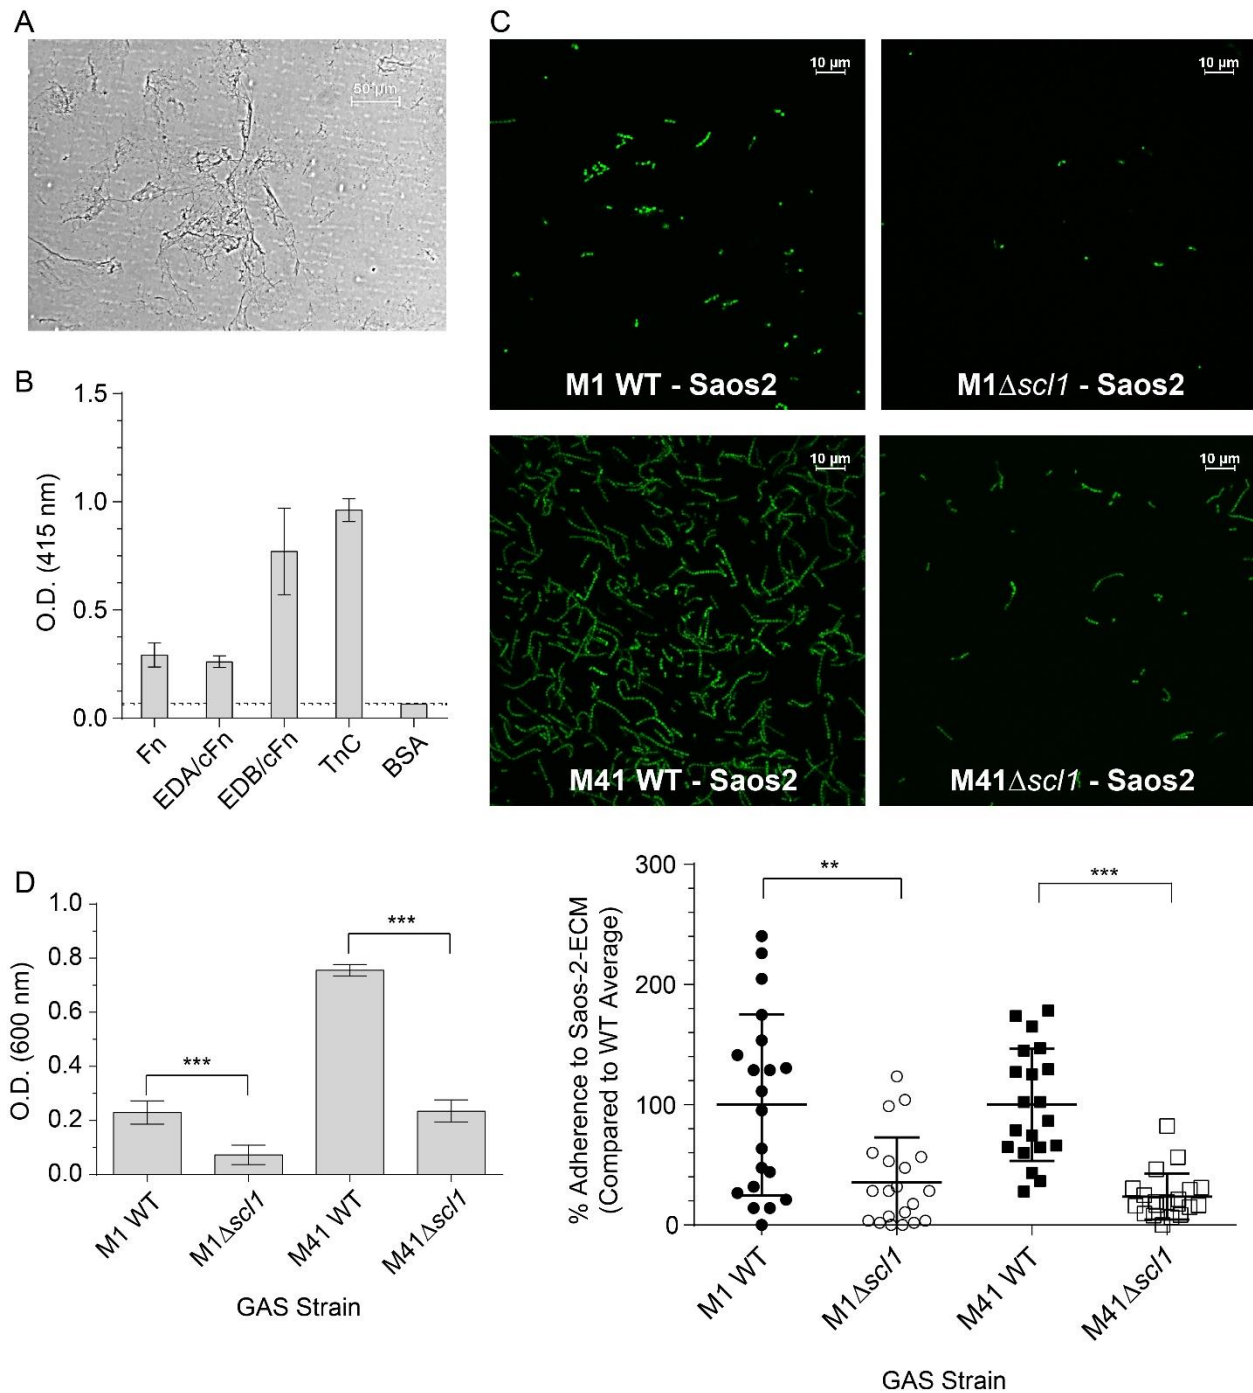

**Fig. S3.** Sc11-mediated GAS attachment to and biofilm formation on ECM deposited by bone osteosarcoma cells. WT GAS strains M1 and M41, and their isogenic  $\Delta scI1$  mutants were compared for attachment and biofilm formation on the ECM produced by osteosarcoma Saos-2 cells.

A. Representative image of Ponceau S staining of ECM network deposited by Saos-2 cells.

B. Characterization of the ECM deposited by Saos-2 cells by ELISA. The presence of total Fn, EDA/cFn, EDB/cFn, and TnC was assessed with specific anti-ECM mAbs and secondary HRP-conjugated antibody. Graph bars indicate the mean OD<sub>415nm</sub> from three independent experiments, each in triplicate wells (N=3±SD). Dashed line indicate threshold OD<sub>415nm</sub> +2SD values recorded for BSA control wells.

C. GAS attachment on Saos-2-derived ECM. Isogenic GFP-GAS strains were inoculated onto Saos-2-derived matrices, allowed to attach for 1 h, and imaged using fluorescent confocal microscope with 100x objective. *Top*, representative images of attached GAS were taken in 20 fields. *Bottom*, quantification of GAS attachment with WT binding set as a 100%. Bacteria were counted in 20 fields and the average was calculated. Statistical analysis was calculated using Student's two-tailed *t*-test from two independent experiments, each performed in duplicate wells (N=2±SD); \*\*P≤0.01, \*\*\*P≤0.001. Statistical significance evaluates the difference between adherence to Saos-2-derived matrices by the WT and their respective isogenic  $\Delta$ *scII* mutants. Each symbol represents one imaged-field.

D. GAS biofilm formation on Saos-2-derived ECM. Isogenic GAS strains were inoculated onto Saos-2-derived matrices and grown for 24 hours. Bacterial biomass was evaluated spectrophotometrically following crystal violet staining. Graphic bars indicate the mean OD<sub>600nm</sub> normalized against BSA controls. Statistical analysis was calculated using Student's two-tailed *t*-test from three independent experiments (N=3±SD); \*\*\*P≤0.001.
